# Supplementary material for: Sex influences eQTL effects of SLE and Sjögren’s syndrome-associated genetic polymorphisms
Source: PubMed Central journal article supplement (PMC5657123; doi:10.1186/s13293-017-0153-7), 2017-10-25
Supplement: 13293_2017_153_MOESM1_ESM.pdf [file 13293_2017_153_MOESM1_ESM.pdf]

**a**

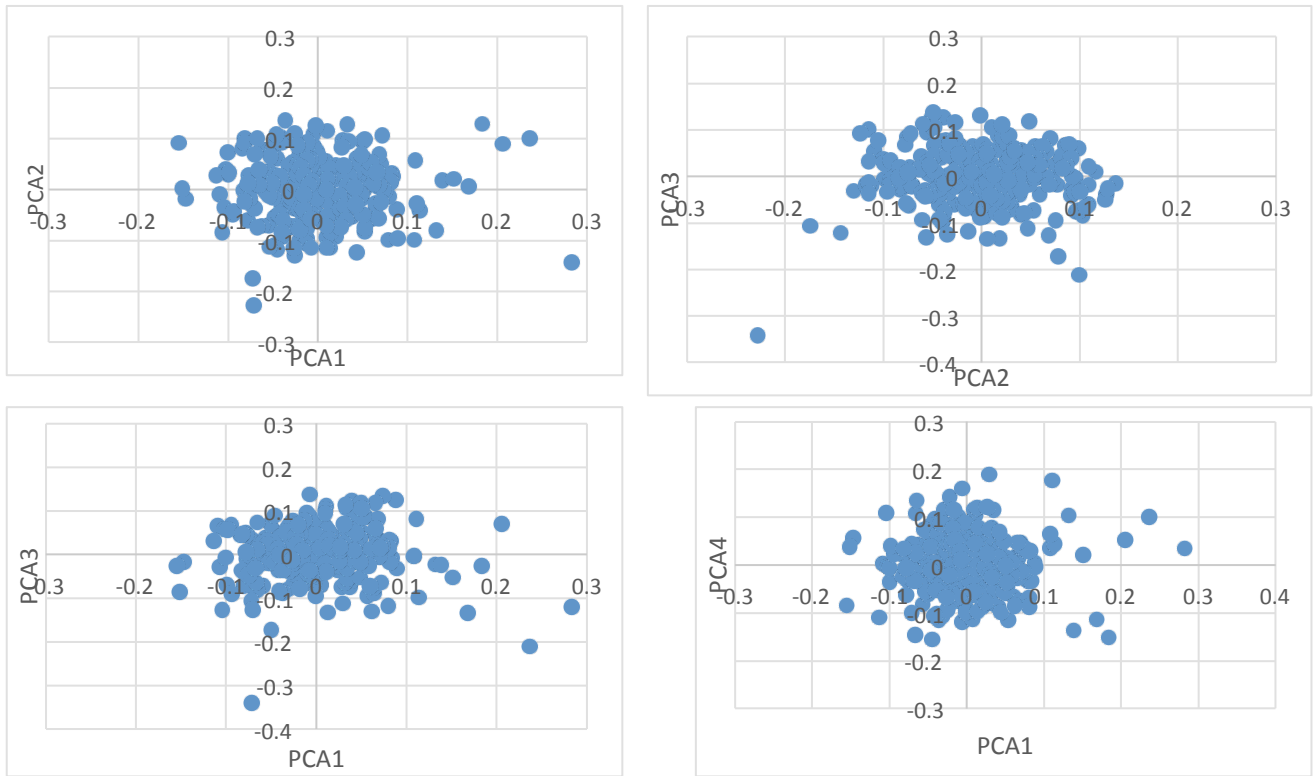

**Figure S1**, Lindén *et al* (continues next page)

**b**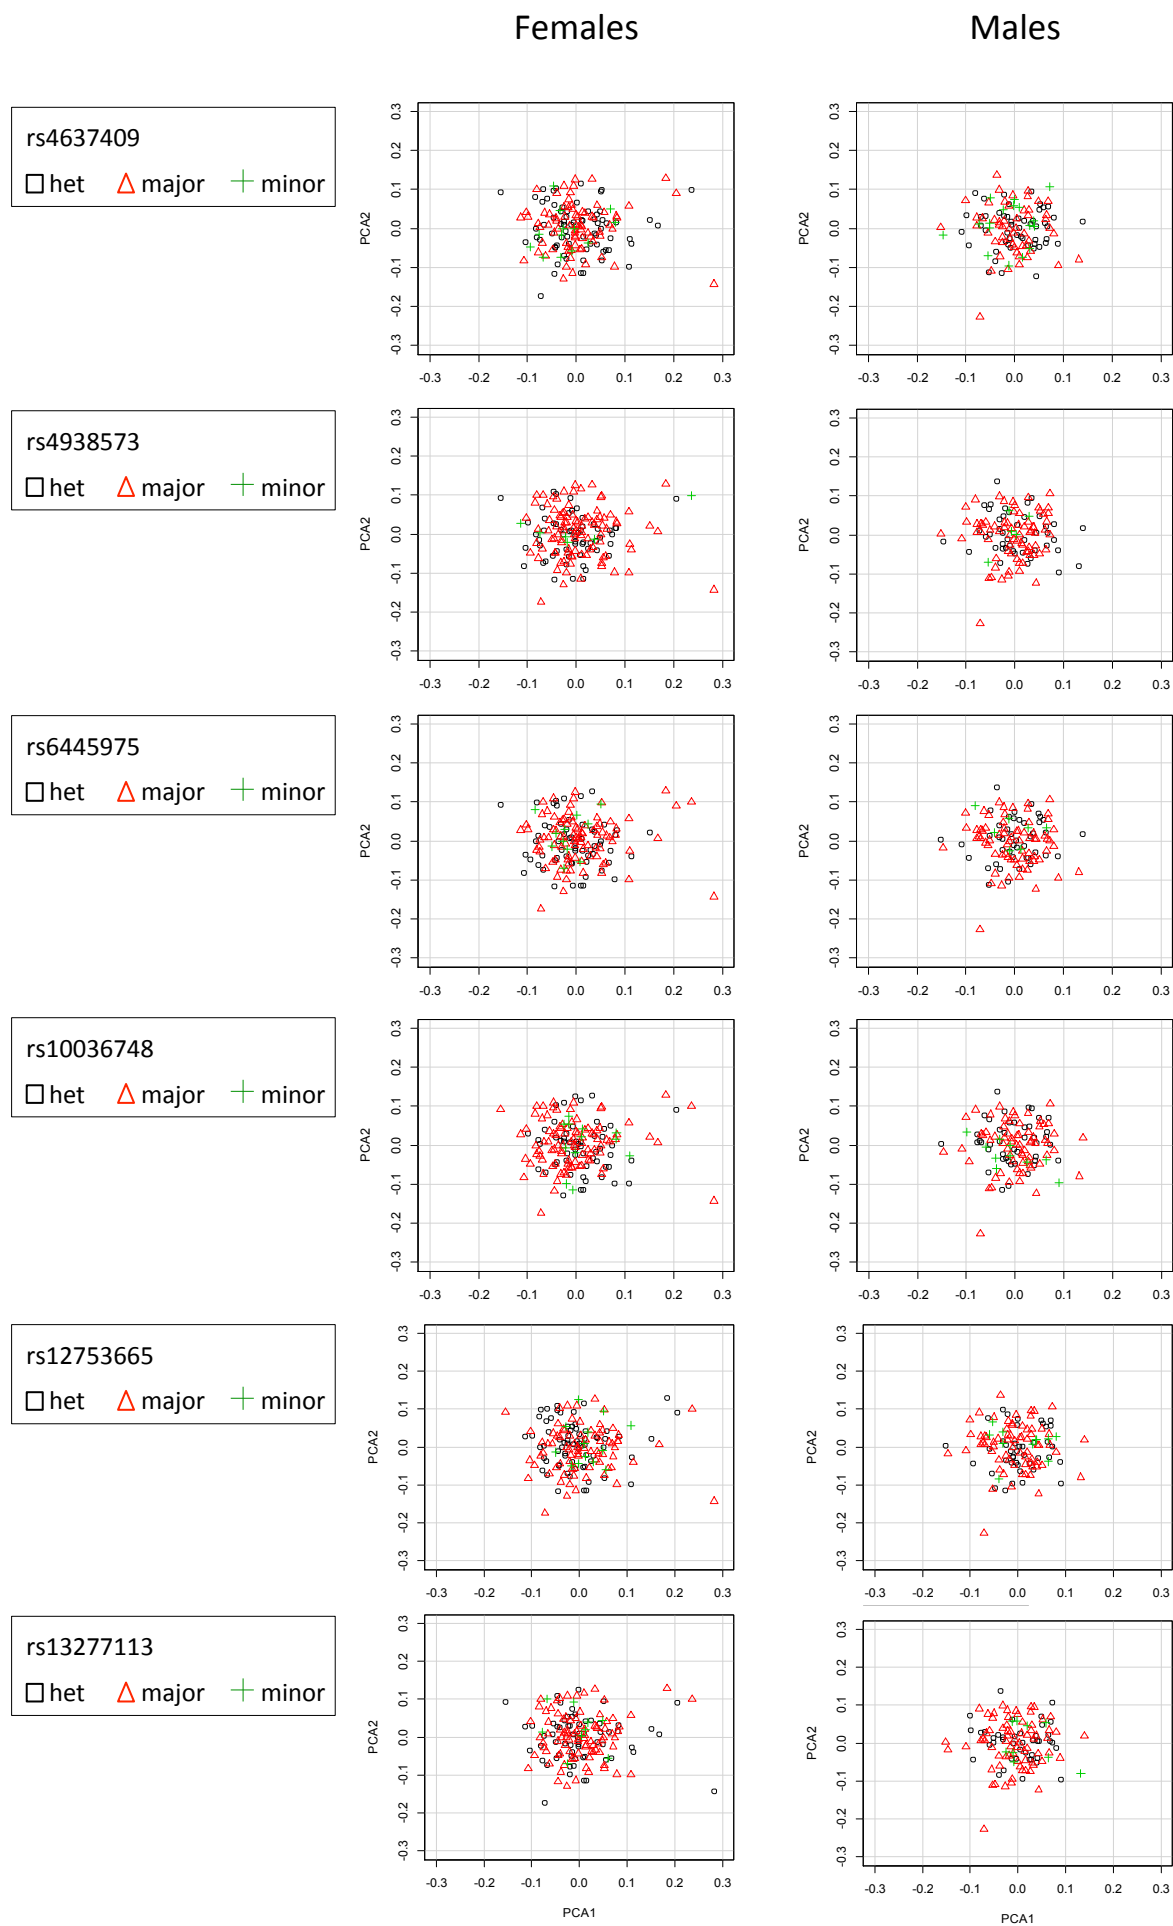**Figure S1, Lindén et al (continued)**
