# Supplementary material for: Sex influences eQTL effects of SLE and Sjögren’s syndrome-associated genetic polymorphisms
Source: PubMed Central journal article supplement (PMC5657123; doi:10.1186/s13293-017-0153-7), 2017-10-25
Supplement: 13293_2017_153_MOESM4_ESM.pdf [file 13293_2017_153_MOESM4_ESM.pdf]

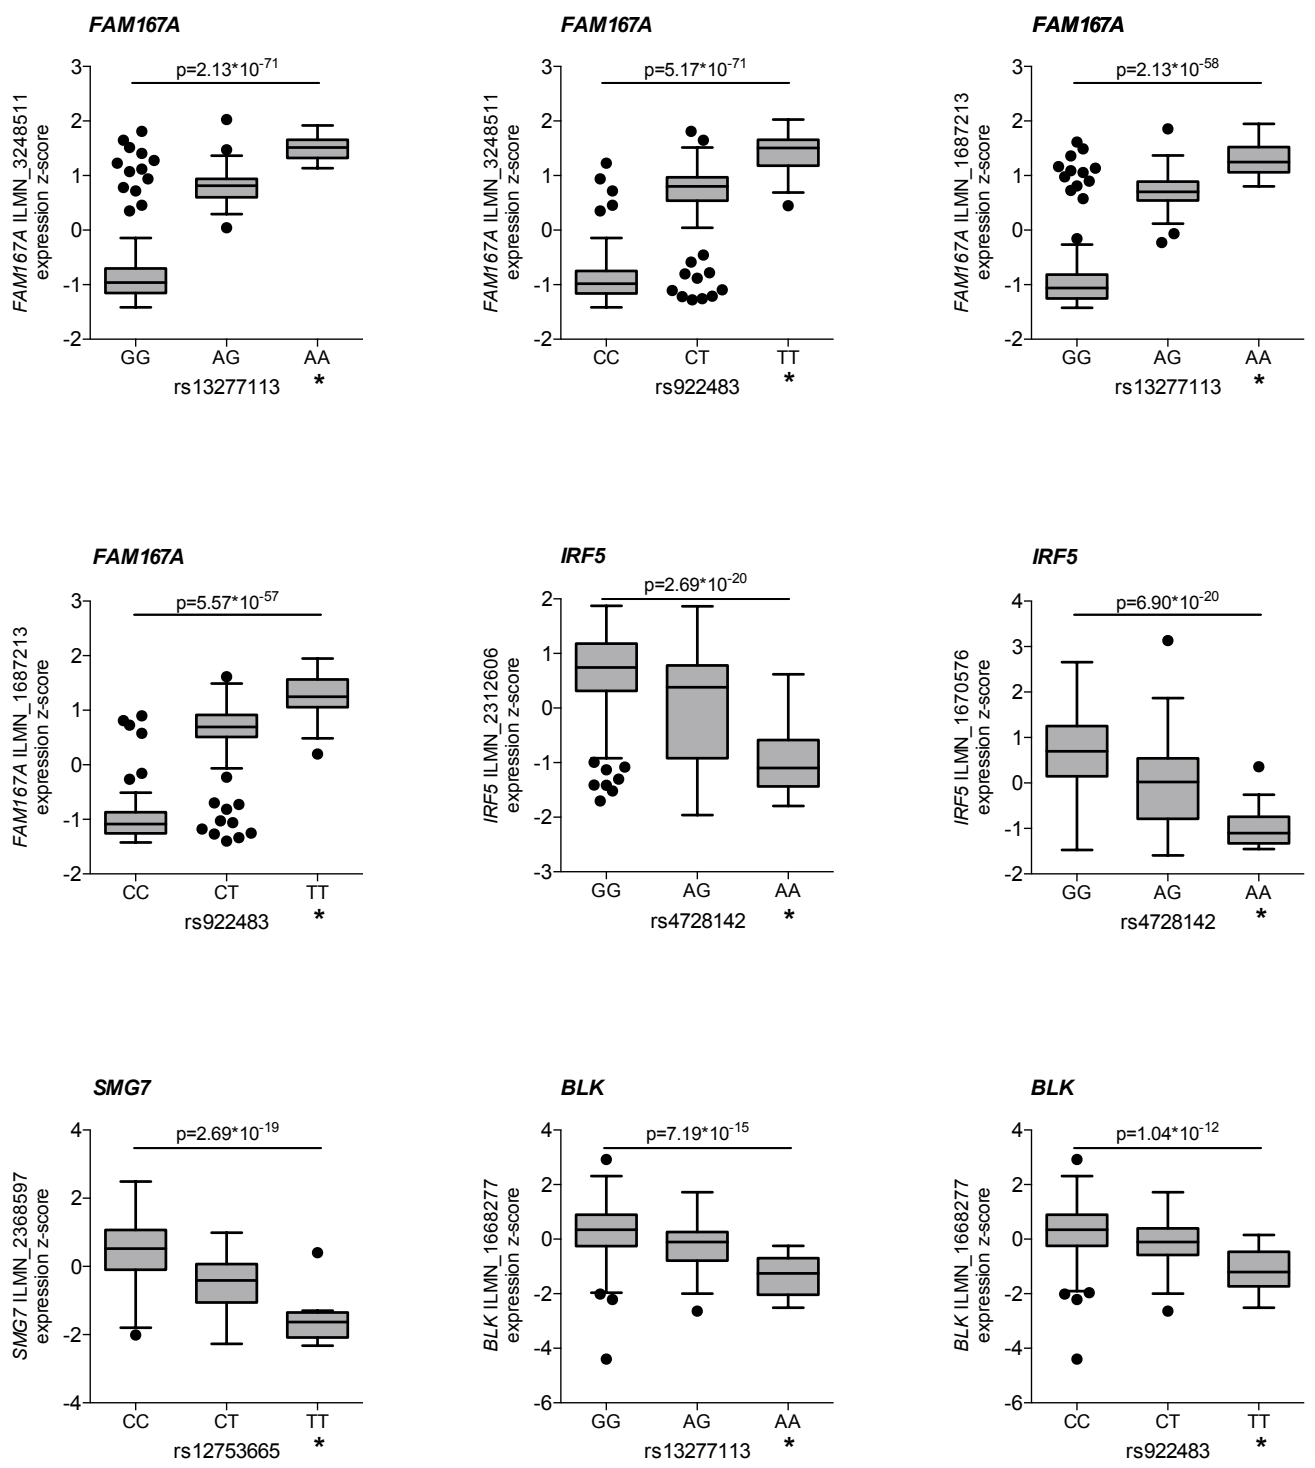

Figure S2, Lindén *et al*

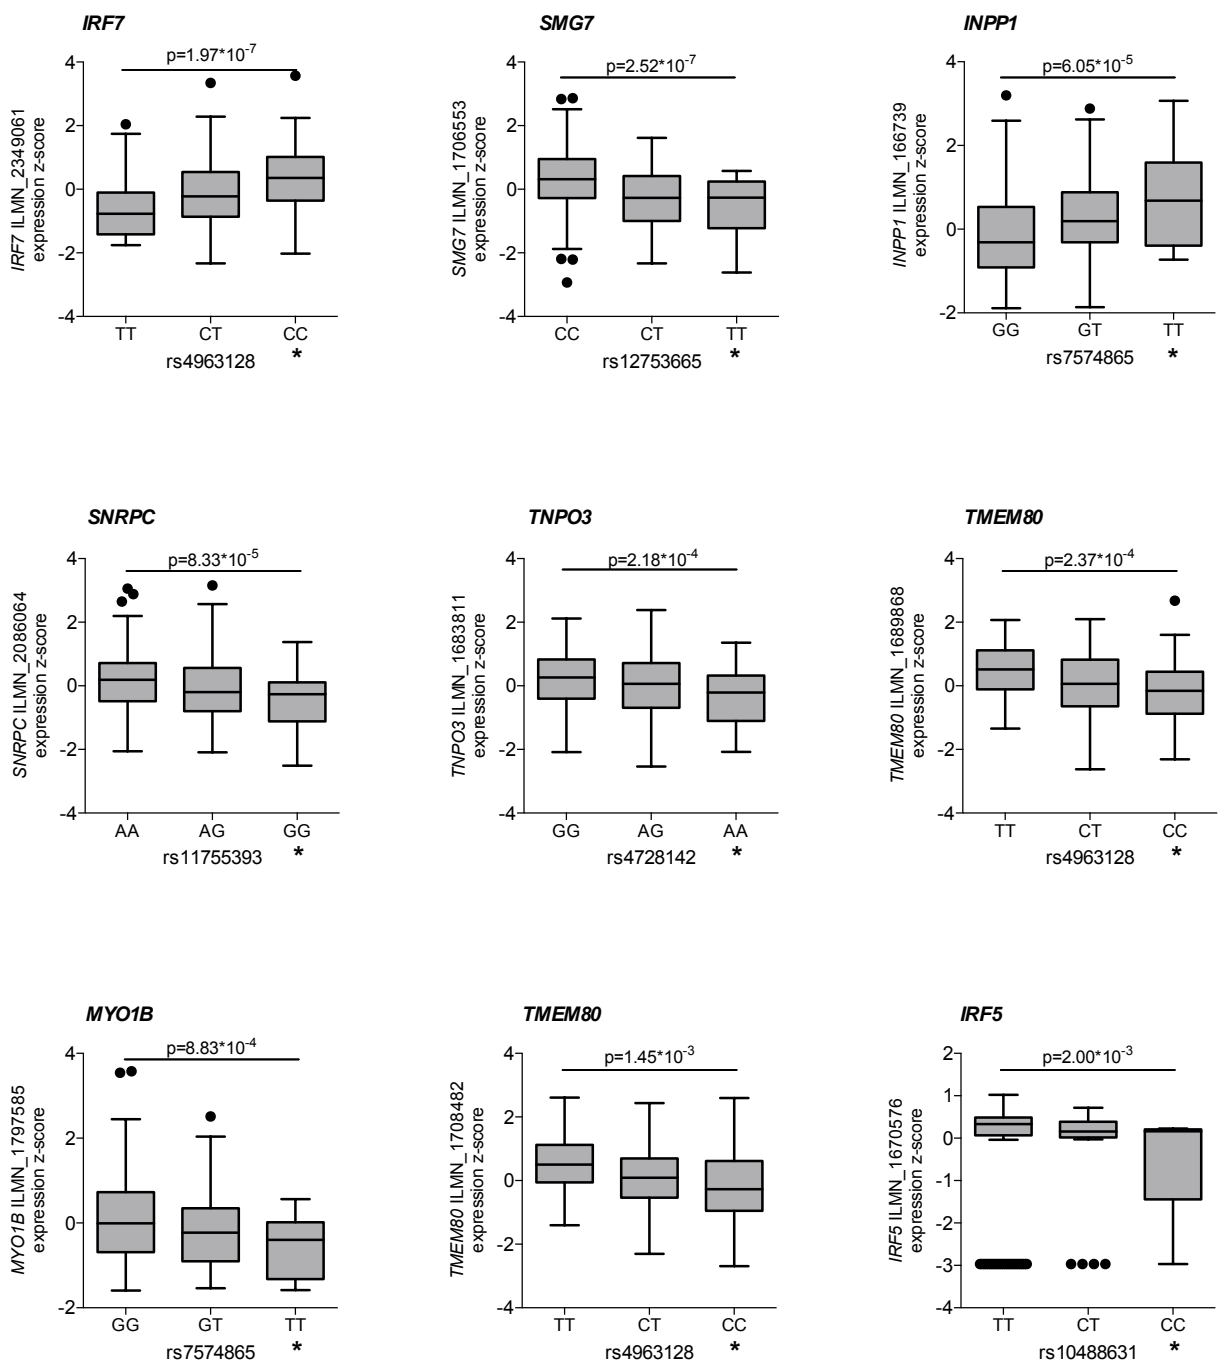

Figure S2, Lindén *et al* (continued)

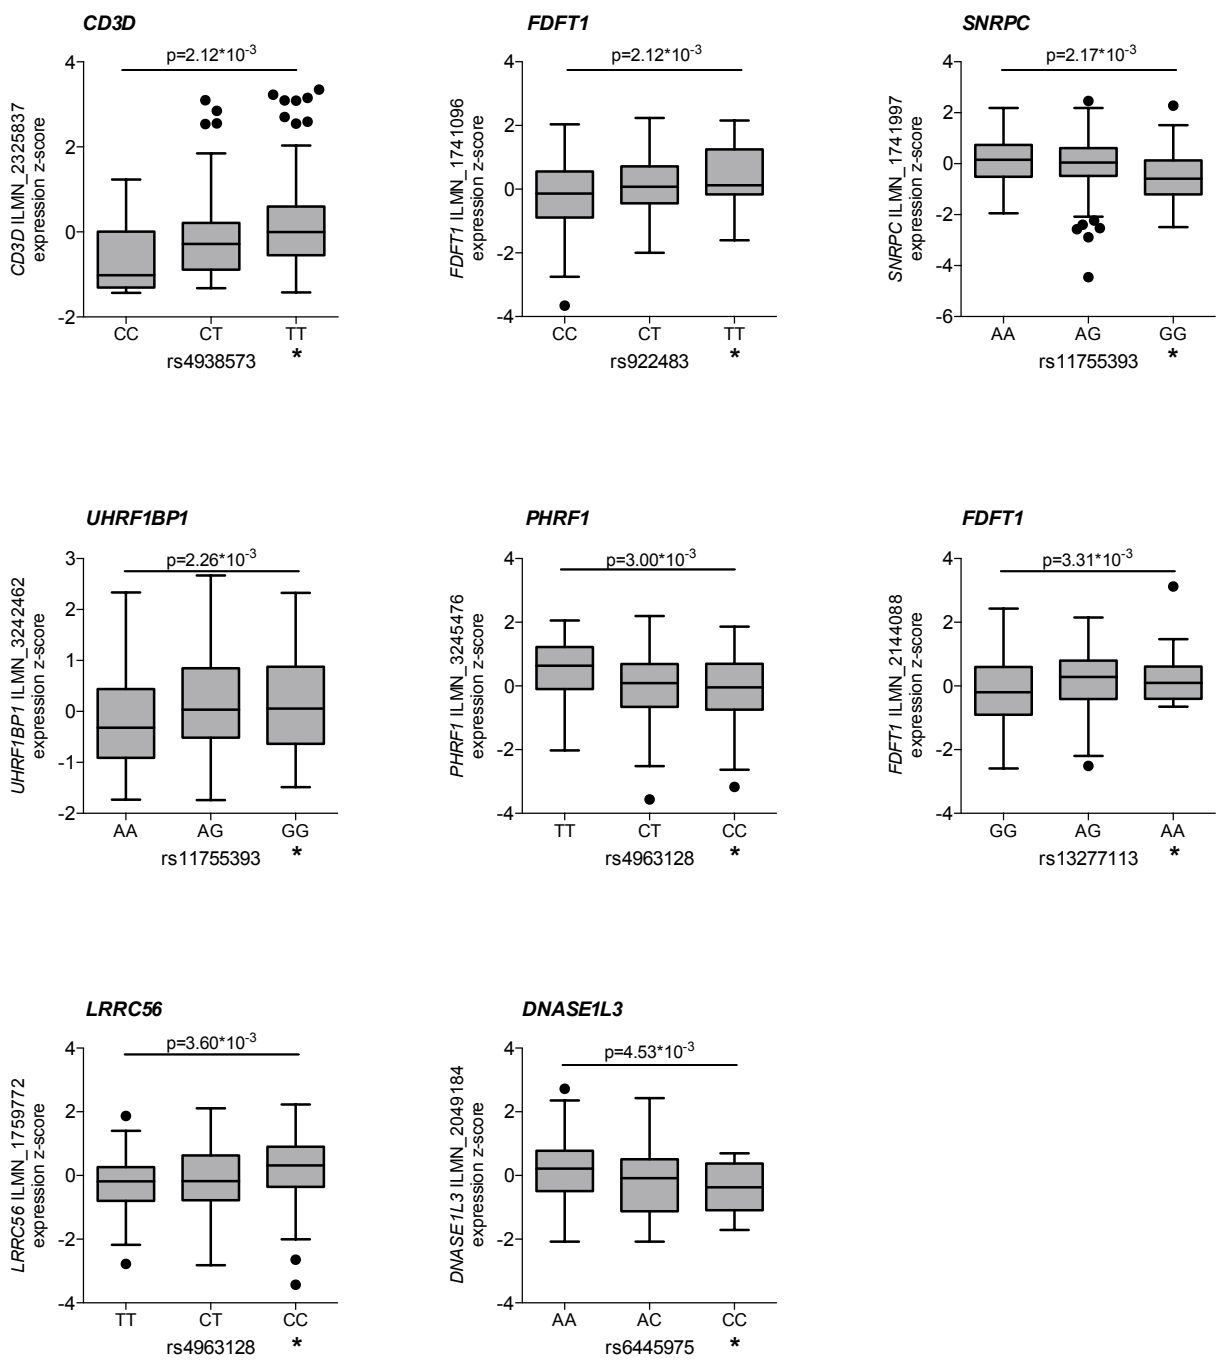

Figure S2, Lindén *et al* (continued)
