# Supplementary material for: Sex influences eQTL effects of SLE and Sjögren’s syndrome-associated genetic polymorphisms
Source: PubMed Central journal article supplement (PMC5657123; doi:10.1186/s13293-017-0153-7), 2017-10-25
Supplement: 13293_2017_153_MOESM5_ESM.pdf [file 13293_2017_153_MOESM5_ESM.pdf]

**a**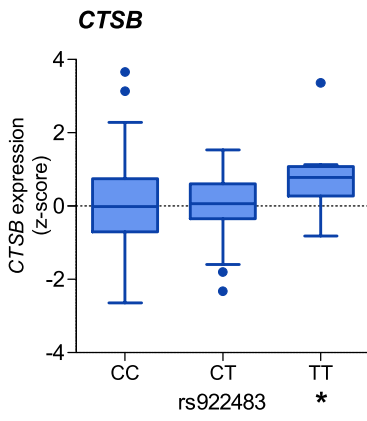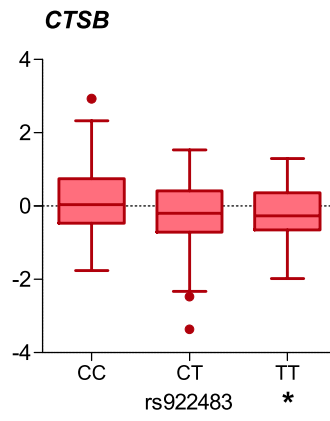

$\beta$  value = 0.51  
 $p_{\text{nom}} = 6.9 \times 10^{-3}$   
 $p_{\text{corr}} = 0.028$

**b**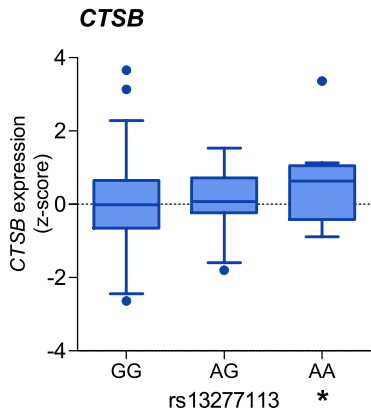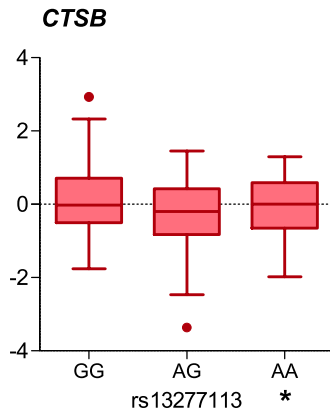

$\beta$  value = 0.50  
 $p_{\text{nom}} = 8.6 \times 10^{-3}$   
 $p_{\text{corr}} = 0.029$

**c**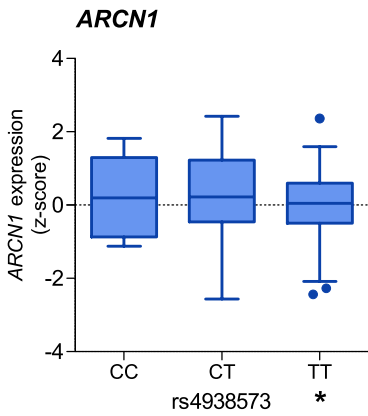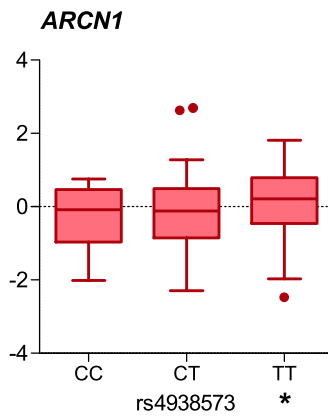

$\beta$  value = 0.46  
 $p_{\text{nom}} = 0.029$   
 $p_{\text{corr}} = 0.042$

**d**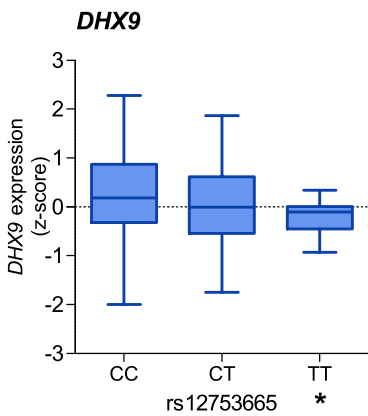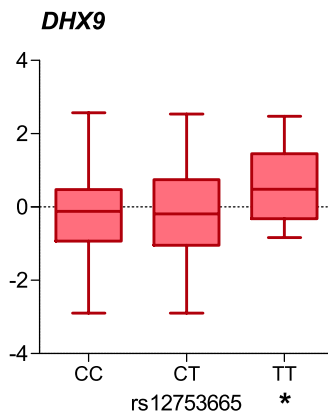

$\beta$  value = -0.45  
 $p_{\text{nom}} = 0.013$   
 $p_{\text{corr}} = 0.044$
